# Supplementary material for: Constructing nanosized CdTe nanocrystal clusters with thermo-responsive photoluminescence characteristics
Source: Royal Society of Chemistry journal article supplement (doi:10.1039/c5ra20111j), 2015-01-01
Supplement: c5ra20111j1.pdf [file c5ra20111j1.pdf]

*Supplementary Information for:*

**Constructing Nanosized CdTe Nanocrystal Clusters with Thermo-responsive  
Photoluminescence Characteristics**

Hucheng Zhang<sup>\*a</sup>, Huili Wang<sup>a</sup>, Kelu Du, Xinxin Ma, Jianji Wang<sup>\*a</sup>

*<sup>a</sup>Collaborative Innovation Centre of Henan Province for Green Manufacturing of Fine Chemicals*

*Key Laboratory of Green Chemical Media and Reactions,*

*Ministry of Education School of Chemistry and Chemical Engineering, Henan Normal University,*

*Xinxiang, Henan 453007, P. R. China*

*E-mail: [hzhang@henannu.edu.cn](mailto:hzhang@henannu.edu.cn); [jwang@henannu.edu.cn](mailto:jwang@henannu.edu.cn).*

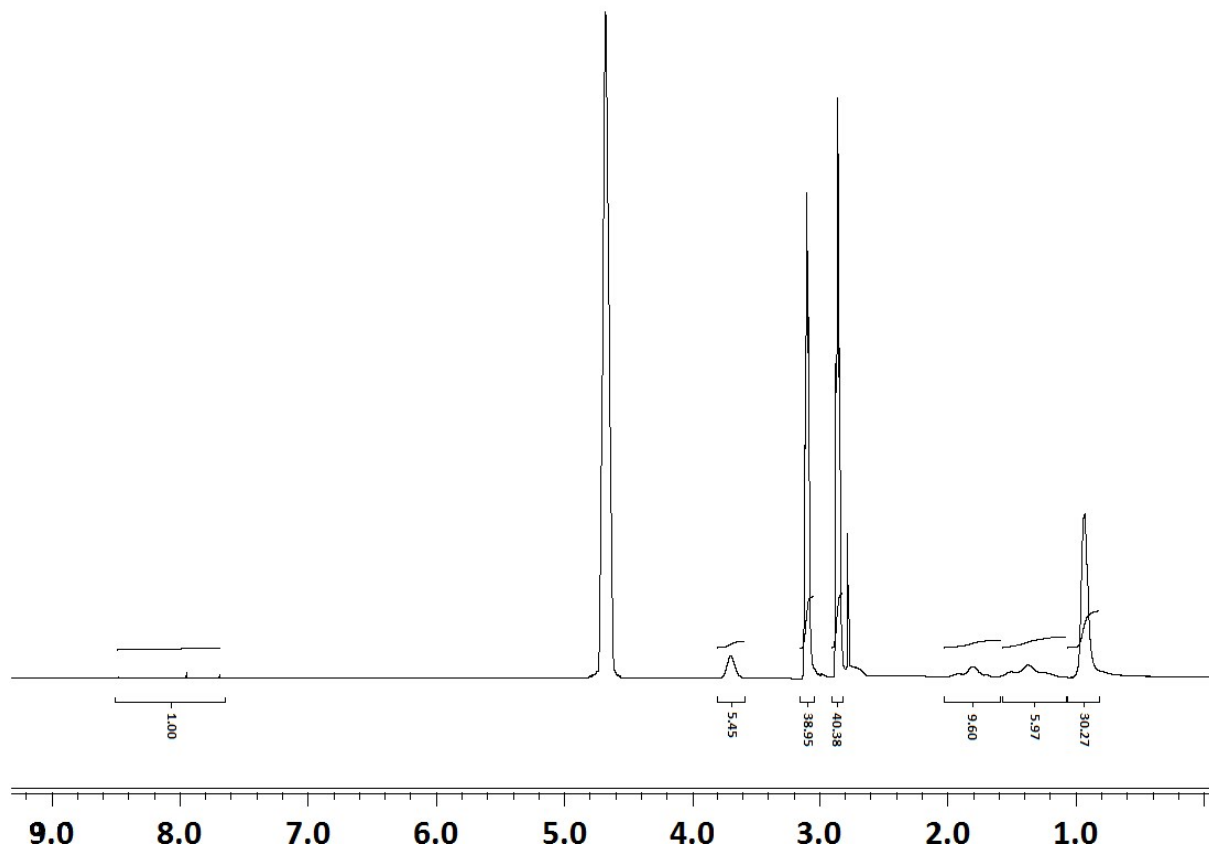

**Fig. S1** integrals for  $^1\text{H}$  NMR spectrum of PNAEAM<sub>12</sub>-b-PNIPAM<sub>290</sub> in D<sub>2</sub>O at room temperature.

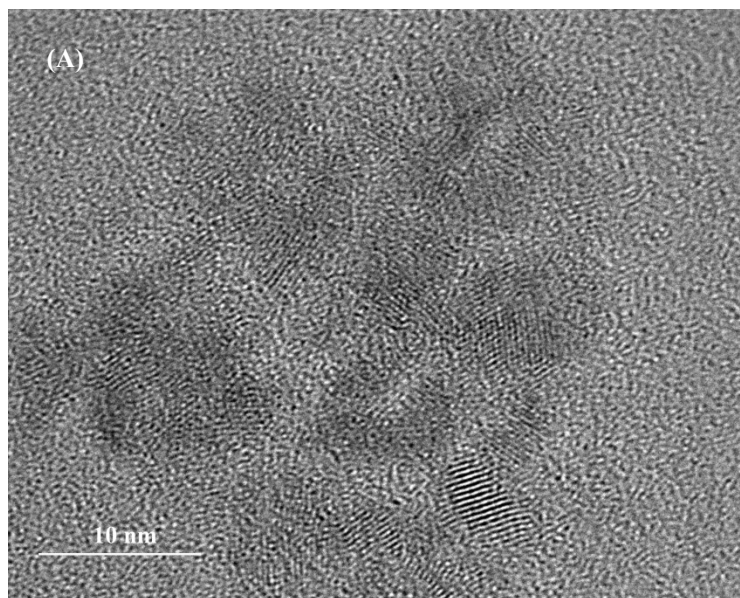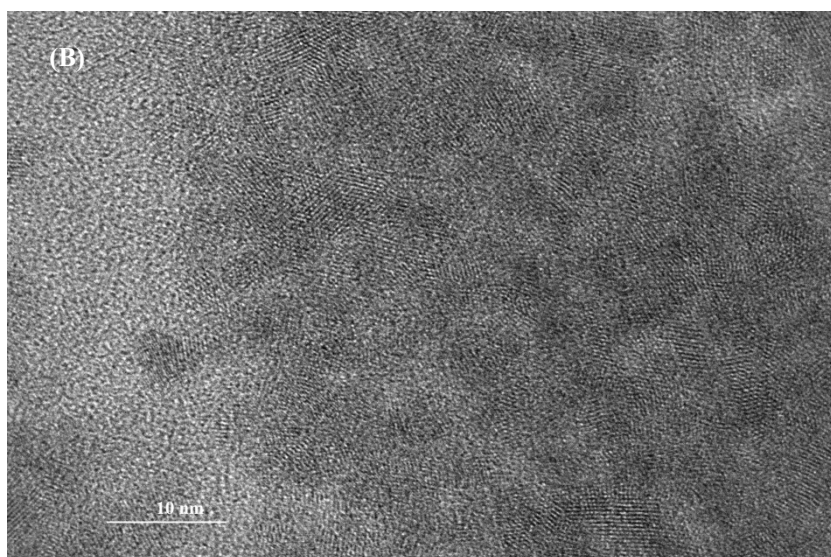

**Fig. S2** HRTEM images taken respectively from a selected individual CNC of PNAEAM<sub>12</sub>-b-PNIPAM<sub>290</sub>-CdTe CN<sub>6</sub> (A), and from one quarter of a PNAEAM<sub>12</sub>-b-PNIPAM<sub>290</sub>-CdTe CN<sub>24</sub> CNC (B).

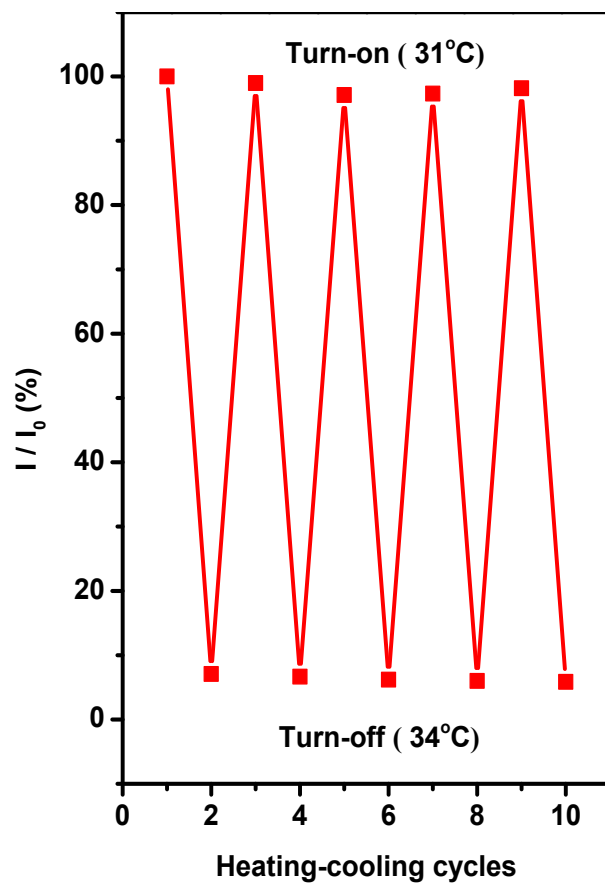

**Fig. S3** Repeatedly turning off/on the PL PNAEAM<sub>12</sub>-b-PNIPAM<sub>290</sub>-CdTe CN<sub>24</sub> CNCs in aqueous solution by heating/cooling cycles between 31 and 34 °C.

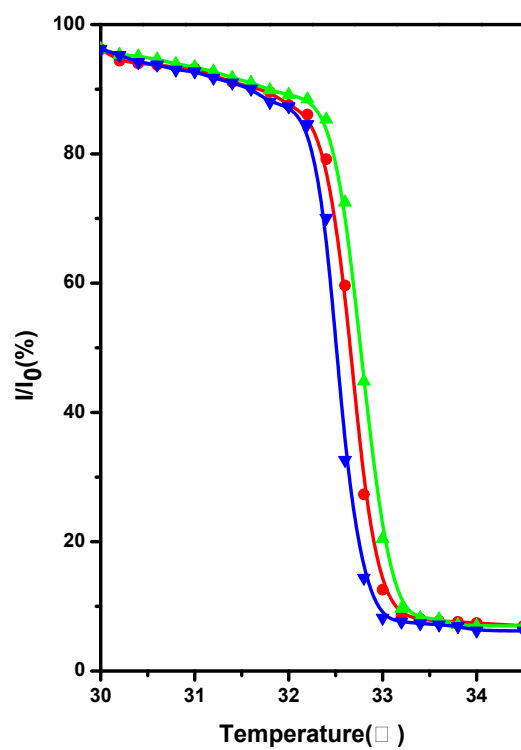

**Fig. S4**  $I/I_0$  as a function of temperature for CNCs of PNAEAM<sub>12</sub>-b-PNIPAM<sub>290</sub>-CdTe NC<sub>24</sub> (▼), PNAEAM<sub>12</sub>-b-PNIPAM<sub>440</sub>-CdTe NC<sub>24</sub> (●), PNAEAM<sub>12</sub>-b-PNIPAM<sub>580</sub>-CdTe NC<sub>24</sub> (▲).

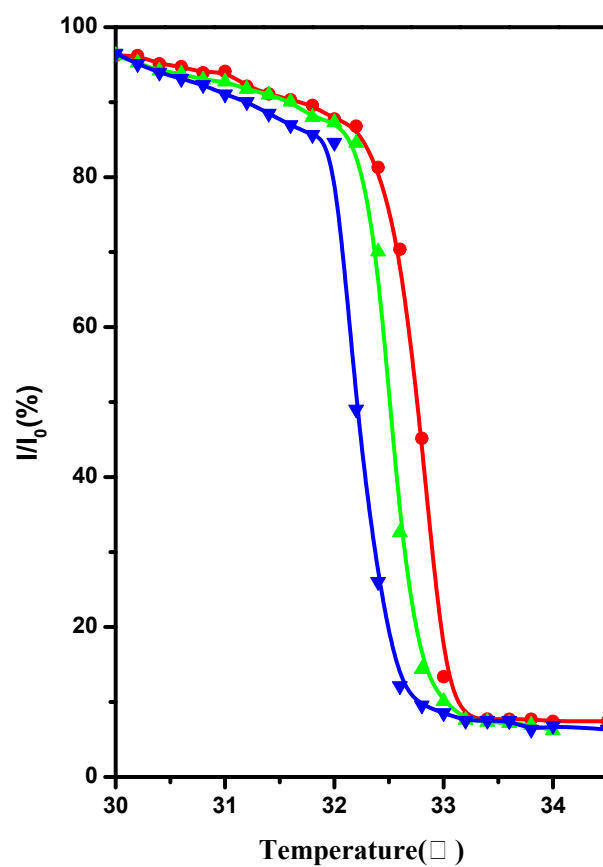

**Fig. S5**  $I/I_0$  as a function of temperature for CNCs of PNAEAM<sub>12</sub>-b-PNIPAM<sub>290</sub>-CdTe NC<sub>24</sub> at different concentration of 0.5 mg/mL (●), 1 mg/mL (▲), 5 mg/mL (▼).
